# Supplementary material for: Analysis of protein-protein interaction and weighted co-expression networks revealed key modules and genes in multiple tissues of Agave sisalana
Source: Research Square preprint supplement (doi:10.21203/rs.3.rs-2031343/v1), 2022-09-07
Supplement: Supplementary file 1 [file 22ddc8d657689fd46ac5d6dc.xlsx]

## Sheet: blue4
GO ID	Term	Annotated	Significant	topgoFisher	genes
GO:0071456	cellular response to hypoxia	8	4	4.2e-05	AS_TRINITY_DN43250_c0_g1_i1,AS_TRINITY_DN46282_c0_g1_i1,AS_TRINITY_DN52684_c2_g1_i1,AS_TRINITY_DN53543_c0_g2_i1
GO:0009734	auxin-activated signaling pathway	51	6	0.00017	AS_TRINITY_DN43871_c0_g1_i1,AS_TRINITY_DN51173_c0_g1_i1,AS_TRINITY_DN51549_c0_g1_i1,AS_TRINITY_DN56716_c0_g1_i1,AS_TRINITY_DN57543_c0_g1_i1,AS_TRINITY_DN58854_c0_g1_i1
GO:0032774	RNA biosynthetic process	990	29	0.00024	AS_TRINITY_DN1177_c0_g1_i1,AS_TRINITY_DN14546_c0_g1_i1,AS_TRINITY_DN16430_c0_g1_i1,AS_TRINITY_DN16462_c0_g1_i1,AS_TRINITY_DN18759_c0_g1_i1,AS_TRINITY_DN36401_c0_g1_i1,AS_TRINITY_DN40120_c0_g1_i1,AS_TRINITY_DN4056_c0_g1_i1,AS_TRINITY_DN41989_c0_g1_i1,AS_TRINITY_DN47873_c0_g1_i1,AS_TRINITY_DN47965_c0_g1_i1,AS_TRINITY_DN50636_c0_g1_i1,AS_TRINITY_DN52032_c0_g2_i1,AS_TRINITY_DN52969_c0_g1_i1,AS_TRINIT…
GO:0009718	anthocyanin-containing compound biosynth...	38	5	0.00036	AS_TRINITY_DN53853_c1_g1_i1,AS_TRINITY_DN56519_c0_g1_i1,AS_TRINITY_DN57244_c0_g2_i1,AS_TRINITY_DN58320_c0_g1_i3,AS_TRINITY_DN59544_c1_g1_i1

## Sheet: darkgreen
GO ID	Term	Annotated	Significant	topgoFisher	genes
GO:0006412	translation	665	36	8.8e-10	AS_TRINITY_DN104068_c0_g1_i1,AS_TRINITY_DN105272_c0_g1_i1,AS_TRINITY_DN110542_c0_g1_i1,AS_TRINITY_DN114521_c0_g1_i1,AS_TRINITY_DN118373_c0_g1_i1,AS_TRINITY_DN120241_c0_g1_i1,AS_TRINITY_DN1241_c0_g1_i1,AS_TRINITY_DN134431_c0_g1_i1,AS_TRINITY_DN16256_c0_g1_i1,AS_TRINITY_DN18305_c0_g1_i1,AS_TRINITY_DN20372_c0_g1_i1,AS_TRINITY_DN25018_c0_g1_i1,AS_TRINITY_DN25449_c0_g1_i1,AS_TRINITY_DN29990_c0_g1_i1,A…
GO:0006879	cellular iron ion homeostasis	10	3	0.00066	AS_TRINITY_DN24490_c0_g1_i1,AS_TRINITY_DN45540_c0_g1_i1,AS_TRINITY_DN74986_c0_g1_i1

## Sheet: darkolivegreen
GO ID	Term	Annotated	Significant	topgoFisher	genes
GO:1900150	regulation of defense response to fungus	4	2	0.0004	AS_TRINITY_DN50538_c0_g1_i1,AS_TRINITY_DN59068_c3_g1_i1
GO:0016132	brassinosteroid biosynthetic process	5	2	0.00066	AS_TRINITY_DN45622_c1_g1_i1,AS_TRINITY_DN57367_c1_g1_i1
GO:0060261	positive regulation of transcription initiation from RNA polymerase II promoter	5	2	0.00066	AS_TRINITY_DN51494_c0_g1_i1,AS_TRINITY_DN51700_c0_g1_i1

## Sheet: darkorange
GO ID	Term	Annotated	Significant	topgoFisher	genes
GO:0061025	membrane fusion	29	5	0.00014	AS_TRINITY_DN52812_c0_g1_i1,AS_TRINITY_DN55549_c0_g1_i2,AS_TRINITY_DN55979_c0_g1_i1,AS_TRINITY_DN56532_c0_g1_i1,AS_TRINITY_DN57809_c1_g1_i1
GO:0009742	: brassinosteroid mediated signaling pathway	10	3	0.00061	AS_TRINITY_DN57178_c0_g1_i1,AS_TRINITY_DN58962_c4_g1_i1,AS_TRINITY_DN59759_c2_g1_i1

## Sheet: darkred
GO ID	Term	Annotated	Significant	topgoFisher	genes
GO:0009809	lignin biosynthetic process	11	5	1.7e-05	AS_TRINITY_DN51044_c0_g1_i1,AS_TRINITY_DN54468_c0_g1_i1,AS_TRINITY_DN55187_c0_g1_i1,AS_TRINITY_DN57866_c2_g1_i1,AS_TRINITY_DN58430_c2_g1_i1
GO:0072657	protein localization to membrane	53	7	4.2e-05	AS_TRINITY_DN47491_c0_g1_i1,AS_TRINITY_DN51742_c0_g2_i1,AS_TRINITY_DN53829_c1_g1_i1,AS_TRINITY_DN56246_c0_g1_i1,AS_TRINITY_DN57149_c1_g1_i1,AS_TRINITY_DN57328_c0_g1_i1,AS_TRINITY_DN59121_c0_g1_i1
GO:0015031	protein transport	292	23	5.6e-05	AS_TRINITY_DN10332_c0_g1_i1,AS_TRINITY_DN46860_c0_g1_i1,AS_TRINITY_DN49039_c0_g1_i1,AS_TRINITY_DN49427_c0_g1_i1,AS_TRINITY_DN49989_c0_g1_i1,AS_TRINITY_DN51427_c1_g1_i1,AS_TRINITY_DN51796_c0_g1_i1,AS_TRINITY_DN51958_c0_g2_i1,AS_TRINITY_DN55246_c0_g1_i1,AS_TRINITY_DN55246_c0_g2_i1,AS_TRINITY_DN55392_c0_g1_i2,AS_TRINITY_DN55669_c1_g1_i1,AS_TRINITY_DN56246_c0_g1_i1,AS_TRINITY_DN56544_c11_g1_i1,AS_TRI…
GO:0080162	intracellular auxin transport	8	4	8.2e-05	AS_TRINITY_DN23530_c0_g1_i1,AS_TRINITY_DN33662_c0_g1_i1,AS_TRINITY_DN53658_c0_g1_i1,AS_TRINITY_DN54574_c0_g1_i1
GO:0051017	actin filament bundle assembly	10	4	0.00023	AS_TRINITY_DN49994_c0_g1_i1,AS_TRINITY_DN57128_c1_g1_i1,AS_TRINITY_DN57318_c0_g1_i1,AS_TRINITY_DN88151_c0_g1_i1
GO:0006556	S-adenosylmethionine biosynthetic process	12	4	0.00052	AS_TRINITY_DN11200_c0_g1_i1,AS_TRINITY_DN46558_c0_g1_i1,AS_TRINITY_DN48882_c0_g1_i1,AS_TRINITY_DN59342_c1_g1_i10
GO:0006621	protein retention in ER lumen	6	3	0.00071	AS_TRINITY_DN55132_c0_g1_i1,AS_TRINITY_DN57305_c0_g1_i2,AS_TRINITY_DN57519_c0_g1_i2
GO:0006886	intracellular protein transport	214	12	0.00087	AS_TRINITY_DN10332_c0_g1_i1,AS_TRINITY_DN49039_c0_g1_i1,AS_TRINITY_DN49427_c0_g1_i1,AS_TRINITY_DN55669_c1_g1_i1,AS_TRINITY_DN56246_c0_g1_i1,AS_TRINITY_DN56544_c11_g1_i1,AS_TRINITY_DN58239_c1_g1_i1,AS_TRINITY_DN58528_c1_g1_i1,AS_TRINITY_DN59293_c1_g1_i1,AS_TRINITY_DN59534_c1_g1_i4,AS_TRINITY_DN59681_c2_g1_i7,AS_TRINITY_DN59760_c2_g1_i5
GO:0006890	retrograde vesicle-mediated transport, Golgi to endoplasmic reticulum	14	4	0.00099	AS_TRINITY_DN18021_c0_g1_i1,AS_TRINITY_DN52940_c0_g1_i1,AS_TRINITY_DN56993_c0_g1_i1,AS_TRINITY_DN57521_c1_g1_i1

## Sheet: magenta
GO ID	Term	Annotated	Significant	topgoFisher	genes
GO:0006412	translation	665	53	1.2e-08	AS_TRINITY_DN101252_c0_g1_i1,AS_TRINITY_DN104463_c0_g1_i1,AS_TRINITY_DN105254_c0_g1_i1,AS_TRINITY_DN105740_c0_g1_i1,AS_TRINITY_DN109302_c0_g1_i1,AS_TRINITY_DN114946_c0_g1_i1,AS_TRINITY_DN117145_c0_g1_i1,AS_TRINITY_DN120833_c0_g1_i1,AS_TRINITY_DN123869_c0_g1_i1,AS_TRINITY_DN124097_c0_g1_i1,AS_TRINITY_DN124211_c0_g1_i1,AS_TRINITY_DN125701_c0_g1_i1,AS_TRINITY_DN130553_c0_g1_i1,AS_TRINITY_DN131652_c0…
GO:0006414	translational elongation	91	15	1.8e-05	AS_TRINITY_DN109302_c0_g1_i1,AS_TRINITY_DN117145_c0_g1_i1,AS_TRINITY_DN23139_c0_g1_i1,AS_TRINITY_DN23802_c0_g1_i1,AS_TRINITY_DN32898_c0_g1_i1,AS_TRINITY_DN33232_c0_g1_i1,AS_TRINITY_DN34582_c0_g1_i1,AS_TRINITY_DN43503_c0_g1_i1,AS_TRINITY_DN51181_c0_g1_i1,AS_TRINITY_DN62735_c0_g1_i1,AS_TRINITY_DN65192_c0_g1_i1,AS_TRINITY_DN66509_c0_g1_i1,AS_TRINITY_DN72974_c0_g1_i1,AS_TRINITY_DN80925_c0_g1_i1,AS_TR…
GO:0002182	cytoplasmic translational elongation	8	4	3.9e-05	AS_TRINITY_DN109302_c0_g1_i1,AS_TRINITY_DN23802_c0_g1_i1,AS_TRINITY_DN32898_c0_g1_i1,AS_TRINITY_DN62735_c0_g1_i1
GO:1990570	GDP-mannose transmembrane transport	5	3	0.00021	AS_TRINITY_DN104061_c0_g1_i1,AS_TRINITY_DN52368_c0_g1_i1,AS_TRINITY_DN64366_c0_g1_i1
GO:0006098	pentose-phosphate shunt	34	6	0.00032	AS_TRINITY_DN105395_c0_g1_i1,AS_TRINITY_DN105568_c0_g1_i1,AS_TRINITY_DN132234_c0_g1_i1,AS_TRINITY_DN132485_c0_g1_i1,AS_TRINITY_DN29087_c0_g1_i1,AS_TRINITY_DN31434_c0_g1_i1

## Sheet: pink
GO ID	Term	Annotated	Significant	topgoFisher	genes
GO:0006468	protein phosphorylation	829	43	3.8e-06	AS_TRINITY_DN10382_c0_g1_i1,AS_TRINITY_DN105729_c0_g1_i1,AS_TRINITY_DN117682_c0_g1_i1,AS_TRINITY_DN117926_c0_g1_i1,AS_TRINITY_DN120567_c0_g1_i1,AS_TRINITY_DN127872_c0_g1_i1,AS_TRINITY_DN130651_c0_g1_i1,AS_TRINITY_DN130908_c0_g1_i1,AS_TRINITY_DN131556_c0_g1_i1,AS_TRINITY_DN2691_c0_g1_i1,AS_TRINITY_DN29785_c0_g1_i1,AS_TRINITY_DN31417_c0_g1_i1,AS_TRINITY_DN32585_c0_g1_i1,AS_TRINITY_DN32838_c0_g1_i1,…
GO:0010338	leaf formation	3	3	1.4e-05	AS_TRINITY_DN30130_c0_g1_i1,AS_TRINITY_DN35557_c0_g1_i1,AS_TRINITY_DN54761_c0_g1_i1
GO:0006357	regulation of transcription from RNA pol...	164	13	0.00011	AS_TRINITY_DN25954_c0_g1_i1,AS_TRINITY_DN27475_c0_g1_i1,AS_TRINITY_DN33049_c0_g1_i1,AS_TRINITY_DN40308_c0_g1_i1,AS_TRINITY_DN46301_c1_g1_i1,AS_TRINITY_DN51738_c0_g1_i1,AS_TRINITY_DN52383_c0_g1_i1,AS_TRINITY_DN54140_c0_g1_i1,AS_TRINITY_DN56409_c1_g1_i1,AS_TRINITY_DN56434_c0_g1_i1,AS_TRINITY_DN59692_c1_g1_i1,AS_TRINITY_DN76800_c0_g1_i1,AS_TRINITY_DN88098_c1_g1_i1
GO:0009734	auxin-activated signaling pathway	51	7	0.00022	AS_TRINITY_DN102666_c0_g1_i1,AS_TRINITY_DN28221_c0_g1_i1,AS_TRINITY_DN41184_c0_g1_i1,AS_TRINITY_DN48055_c0_g1_i1,AS_TRINITY_DN50855_c0_g1_i1,AS_TRINITY_DN56330_c0_g1_i1,AS_TRINITY_DN58280_c2_g2_i1
GO:0010227	floral organ abscission	2	2	0.00059	AS_TRINITY_DN39265_c0_g1_i1,AS_TRINITY_DN55542_c0_g1_i1
GO:0090615	mitochondrial mRNA processing	2	2	0.00059	AS_TRINITY_DN105702_c0_g1_i1,AS_TRINITY_DN17672_c0_g1_i1

## Sheet: purple
GO ID	Term	Annotated	Significant	topgoFisher	genes
GO:0097307	response to farnesol	6	4	1e-05	AS_TRINITY_DN31136_c0_g1_i1,AS_TRINITY_DN42258_c0_g1_i1,AS_TRINITY_DN87114_c0_g1_i1,AS_TRINITY_DN9497_c0_g1_i1
GO:0010200	response to chitin	9	4	7.8e-05	AS_TRINITY_DN35036_c0_g1_i1,AS_TRINITY_DN48652_c0_g1_i1,AS_TRINITY_DN56739_c2_g1_i1,AS_TRINITY_DN56739_c2_g2_i1
GO:0071805	potassium ion transmembrane transport	29	6	0.00016	AS_TRINITY_DN44732_c0_g1_i1,AS_TRINITY_DN50956_c0_g1_i1,AS_TRINITY_DN55276_c0_g1_i1,AS_TRINITY_DN55300_c0_g1_i1,AS_TRINITY_DN55300_c1_g1_i1,AS_TRINITY_DN57795_c2_g2_i12
GO:0055085	transmembrane transport	684	45	0.00017	AS_TRINITY_DN100044_c0_g1_i1,AS_TRINITY_DN100198_c0_g1_i1,AS_TRINITY_DN102740_c0_g1_i1,AS_TRINITY_DN103366_c0_g1_i1,AS_TRINITY_DN106644_c0_g1_i1,AS_TRINITY_DN119035_c0_g1_i1,AS_TRINITY_DN120916_c0_g1_i1,AS_TRINITY_DN121323_c0_g1_i1,AS_TRINITY_DN128077_c0_g1_i1,AS_TRINITY_DN21323_c0_g1_i1,AS_TRINITY_DN21447_c0_g1_i1,AS_TRINITY_DN23471_c0_g1_i1,AS_TRINITY_DN23846_c0_g1_i1,AS_TRINITY_DN26739_c0_g1_i…
GO:0016052	carbohydrate catabolic process	117	11	0.00082	AS_TRINITY_DN113771_c0_g1_i1,AS_TRINITY_DN2965_c0_g1_i1,AS_TRINITY_DN33558_c0_g1_i1,AS_TRINITY_DN33930_c0_g1_i1,AS_TRINITY_DN35496_c0_g1_i1,AS_TRINITY_DN51530_c0_g1_i1,AS_TRINITY_DN52648_c0_g1_i1,AS_TRINITY_DN55422_c1_g2_i3,AS_TRINITY_DN58219_c1_g1_i12,AS_TRINITY_DN59316_c0_g1_i1,AS_TRINITY_DN94343_c0_g1_i1

## Sheet: turquoise
GO ID	Term	Annotated	Significant	topgoFisher	genes
GO:0015979	photosynthesis	87	64	8.7e-26	AS_TRINITY_DN116422_c0_g1_i1,AS_TRINITY_DN130083_c0_g1_i1,AS_TRINITY_DN34446_c0_g1_i1,AS_TRINITY_DN39540_c0_g1_i1,AS_TRINITY_DN39845_c0_g1_i1,AS_TRINITY_DN42888_c0_g1_i1,AS_TRINITY_DN43273_c0_g1_i1,AS_TRINITY_DN43499_c0_g1_i1,AS_TRINITY_DN43951_c0_g1_i2,AS_TRINITY_DN44497_c0_g1_i1,AS_TRINITY_DN44661_c0_g1_i1,AS_TRINITY_DN46211_c0_g1_i1,AS_TRINITY_DN47051_c0_g1_i1,AS_TRINITY_DN47464_c0_g1_i1,AS_TR…
GO:0009765	photosynthesis, light harvesting	19	16	2.6e-12	AS_TRINITY_DN34446_c0_g1_i1,AS_TRINITY_DN48416_c0_g1_i1,AS_TRINITY_DN49540_c0_g1_i1,AS_TRINITY_DN49798_c0_g1_i1,AS_TRINITY_DN50072_c0_g1_i1,AS_TRINITY_DN51490_c0_g1_i1,AS_TRINITY_DN51749_c0_g1_i1,AS_TRINITY_DN52785_c0_g1_i1,AS_TRINITY_DN53200_c1_g1_i1,AS_TRINITY_DN53270_c0_g1_i1,AS_TRINITY_DN53823_c1_g1_i1,AS_TRINITY_DN54912_c0_g1_i1,AS_TRINITY_DN56647_c0_g1_i1,AS_TRINITY_DN58265_c1_g1_i1,AS_TRIN…
GO:0000413	protein peptidyl-prolyl isomerization	59	20	1.5e-08	AS_TRINITY_DN16045_c0_g1_i1,AS_TRINITY_DN23174_c0_g1_i1,AS_TRINITY_DN38541_c0_g1_i1,AS_TRINITY_DN44113_c0_g1_i1,AS_TRINITY_DN44189_c0_g1_i1,AS_TRINITY_DN46113_c1_g1_i1,AS_TRINITY_DN46789_c0_g1_i1,AS_TRINITY_DN47199_c0_g1_i1,AS_TRINITY_DN48647_c0_g1_i1,AS_TRINITY_DN48854_c0_g1_i1,AS_TRINITY_DN49526_c0_g1_i1,AS_TRINITY_DN50599_c1_g1_i2,AS_TRINITY_DN51227_c1_g1_i1,AS_TRINITY_DN52437_c1_g1_i1,AS_TRIN…
GO:0010258	NADH dehydrogenase complex	6	6	2.7e-07	AS_TRINITY_DN35553_c0_g1_i1,AS_TRINITY_DN40091_c0_g1_i1,AS_TRINITY_DN47735_c0_g1_i1,AS_TRINITY_DN50876_c0_g1_i1,AS_TRINITY_DN52372_c0_g1_i1,AS_TRINITY_DN59231_c0_g1_i1
GO:0032259	methylation	416	63	8.8e-06	AS_TRINITY_DN10545_c0_g1_i1,AS_TRINITY_DN129440_c0_g1_i1,AS_TRINITY_DN130081_c0_g1_i2,AS_TRINITY_DN20078_c0_g1_i1,AS_TRINITY_DN28588_c0_g1_i1,AS_TRINITY_DN29871_c0_g1_i1,AS_TRINITY_DN30525_c0_g1_i1,AS_TRINITY_DN30975_c0_g1_i1,AS_TRINITY_DN35101_c0_g1_i1,AS_TRINITY_DN35705_c0_g1_i1,AS_TRINITY_DN39606_c0_g1_i1,AS_TRINITY_DN40026_c0_g1_i1,AS_TRINITY_DN40418_c0_g1_i1,AS_TRINITY_DN41524_c0_g1_i1,AS_TR…
GO:1901259	chloroplast rRNA processing	12	7	1.2e-05	AS_TRINITY_DN46901_c0_g1_i1,AS_TRINITY_DN51334_c0_g1_i1,AS_TRINITY_DN51714_c0_g1_i3,AS_TRINITY_DN53748_c0_g1_i1,AS_TRINITY_DN53927_c0_g1_i1,AS_TRINITY_DN55677_c0_g1_i1,AS_TRINITY_DN57886_c3_g1_i1
GO:0009773	photosynthetic electron transport in pho...	6	5	1.9e-05	AS_TRINITY_DN47051_c0_g1_i1,AS_TRINITY_DN49379_c0_g1_i1,AS_TRINITY_DN50459_c0_g1_i1,AS_TRINITY_DN52419_c0_g1_i1,AS_TRINITY_DN56379_c0_g1_i1
GO:0015995	chlorophyll biosynthetic process	21	8	0.00014	AS_TRINITY_DN40313_c0_g1_i1,AS_TRINITY_DN52377_c0_g1_i1,AS_TRINITY_DN53202_c0_g1_i2,AS_TRINITY_DN53317_c0_g1_i1,AS_TRINITY_DN54840_c0_g1_i1,AS_TRINITY_DN56635_c0_g1_i1,AS_TRINITY_DN58209_c1_g1_i8,AS_TRINITY_DN58269_c0_g1_i1
GO:0006535	cysteine biosynthetic process from serin...	13	6	0.00028	AS_TRINITY_DN31831_c0_g1_i1,AS_TRINITY_DN49339_c0_g1_i1,AS_TRINITY_DN51162_c0_g1_i1,AS_TRINITY_DN54537_c0_g1_i1,AS_TRINITY_DN55171_c1_g1_i1,AS_TRINITY_DN57390_c0_g1_i1
GO:1902600	hydrogen ion transmembrane transport	86	19	0.00039	AS_TRINITY_DN47490_c0_g1_i1,AS_TRINITY_DN49462_c0_g1_i1,AS_TRINITY_DN51287_c0_g1_i1,AS_TRINITY_DN51598_c0_g1_i1,AS_TRINITY_DN51784_c0_g1_i1,AS_TRINITY_DN52583_c0_g1_i1,AS_TRINITY_DN52630_c0_g1_i1,AS_TRINITY_DN53001_c1_g1_i1,AS_TRINITY_DN54297_c1_g1_i1,AS_TRINITY_DN54636_c0_g1_i1,AS_TRINITY_DN56234_c1_g1_i1,AS_TRINITY_DN56437_c1_g1_i1,AS_TRINITY_DN57258_c0_g1_i1,AS_TRINITY_DN57355_c0_g1_i1,AS_TRIN…
GO:0009704	de-etiolation	3	3	0.00052	AS_TRINITY_DN53742_c0_g1_i1,AS_TRINITY_DN56200_c1_g1_i1,AS_TRINITY_DN56762_c0_g1_i1
GO:0010206	photosystem II repair	3	3	0.00052	AS_TRINITY_DN51749_c0_g1_i1,AS_TRINITY_DN53270_c0_g1_i1,AS_TRINITY_DN5844_c0_g1_i1
GO:0048564	photosystem I assembly	3	3	0.00052	AS_TRINITY_DN50251_c0_g1_i1,AS_TRINITY_DN54607_c0_g1_i1,AS_TRINITY_DN55332_c0_g1_i1
GO:0009820	alkaloid metabolic process	39	10	0.00081	AS_TRINITY_DN20004_c0_g1_i1,AS_TRINITY_DN42055_c0_g1_i1,AS_TRINITY_DN44121_c0_g1_i1,AS_TRINITY_DN49157_c0_g1_i2,AS_TRINITY_DN49552_c0_g1_i1,AS_TRINITY_DN49819_c0_g1_i1,AS_TRINITY_DN51729_c0_g1_i1,AS_TRINITY_DN52434_c0_g1_i1,AS_TRINITY_DN52672_c0_g1_i1,AS_TRINITY_DN55133_c0_g1_i1
